# Supplementary material for: Structural determinants for activation of the Tau kinase CDK5 by the serotonin receptor 5-HT7R
Source: PubMed Central journal article supplement (PMC11031989; doi:10.1186/s12964-024-01612-y), 2024-04-19
Supplement: 12964_2024_1612_MOESM1_ESM.pdf [file 12964_2024_1612_MOESM1_ESM.pdf]

**Additional file 1. Primer sequences used to introduce mutations into 5-HT7R**

| <b>Mutation</b>           | <b>Primer</b>                                                                                                                                     |
|---------------------------|---------------------------------------------------------------------------------------------------------------------------------------------------|
| <b>ΔR395<br/>(HA tag)</b> | for: GATCGAGGATCCATGTACCCATACGACGTCCCAGACTAC<br>rev: GATCGATCTAGATTACAGGTCCCGGTTGAAGAAGGC                                                         |
| <b>ΔR395</b>              | for: CTTTTATATATGCCTTCTTCAACCGGGACCTGCGGGATCCACCGGTCGC<br>rev: GCGACCGGTGGATCCCGCAGGTCCCGGTTGAAGAAGGCATATATAAAAG                                  |
| <b>E325G</b>              | for: CACGAAAGGAAAAACATTTCCATCTTCAAGAGGGGACAGAAAGCAGCCACTACCTTGGG<br>rev: CCCAAGGTAGTGGCTGCTTTCTGTCCCTCTTGAAGATGGAAATGTTTTTCCTTTCGTG               |
| <b>K327S</b>              | for: GAAAGGAAAAACATTTCCATCTTCAAGAGGGAACAGAGCGCAGCCACTACCTTGGGGATC<br>rev: GATCCCCAAGGTAGTGGCTGCGCTCTGTTCCCTCTTGAAGATGGAAATGTTTTTCCTTTC            |
| <b>E325G/K327S</b>        | for:<br>CACGAAAGGAAAAACATTTCCATCTTCAAGAGGGGACAGAGCGCAGCCACTACCTTGGGGATC<br>rev:<br>GATCCCCAAGGTAGTGGCTGCGCTCTGTCCCTCTTGAAGATGGAAATGTTTTTCCTTTCGTG |
| <b>F278A</b>              | for: GGAAGAGCGCAGCCAAACACAAGGCCTCAGGCTTCCCACGCGTG<br>rev: CACGCGTGGGAAGCCTGAGGCCTTGTGTTTGGCTGCGCTCTTCC                                            |
| <b>F281A</b>              | for: GCAGCCAAACACAAGTTCTCAGGCGCCCCACGCGTGCAGCC<br>rev: GGCTGCACGCGTGGGGCGCCTGAGAACTTGTGTTTGGCTGC                                                  |
| <b>F278A/F281A</b>        | for: GGAAGAGCGCAGCCAAACACAAGGCCTCAGGCGCCCCACGCGTGCAGCC<br>rev: GGCTGCACGCGTGGGGCGCCTGAGGCCTTGTGTTTGGCTGCGCTCTTCC                                  |
