# Supplementary material for: Structural determinants for activation of the Tau kinase CDK5 by the serotonin receptor 5-HT7R
Source: PubMed Central journal article supplement (PMC11031989; doi:10.1186/s12964-024-01612-y), 2024-04-19
Supplement: 12964_2024_1612_MOESM3_ESM.pdf [file 12964_2024_1612_MOESM3_ESM.pdf]

**Additional file 3. Description of prepared systems for molecular dynamics simulations.**

| <b>System</b> | <b>Model</b>      | <b>Cell</b> | <b>POPC<br/>Lipid<br/>count</b> | <b>Sodium<br/>ion<br/>count</b> | <b>Chlorine<br/>ion<br/>count</b> | <b>TIP3P<br/>water<br/>count</b> | <b>System size, nm</b>      |
|---------------|-------------------|-------------|---------------------------------|---------------------------------|-----------------------------------|----------------------------------|-----------------------------|
| 1             | <i>m5HT7/CDK5</i> | hexagon     | 400                             | 137                             | 156                               | 50159                            | 13.12*<br>11.36*15.378*6.56 |
| 2             | <i>h5HT7/CDK5</i> | hexagon     | 478                             | 154                             | 171                               | 56641                            | 4.25 *12.34<br>*14.84*7.13  |
