# Supplementary material for: Structural determinants for activation of the Tau kinase CDK5 by the serotonin receptor 5-HT7R
Source: PubMed Central journal article supplement (PMC11031989; doi:10.1186/s12964-024-01612-y), 2024-04-19
Supplement: 12964_2024_1612_MOESM9_ESM.pdf [file 12964_2024_1612_MOESM9_ESM.pdf]

**Model Confidence**

■ pLDDT > 90

■ 90 > pLDDT > 70

■ 70 > pLDDT > 50

■ pLDDT < 50

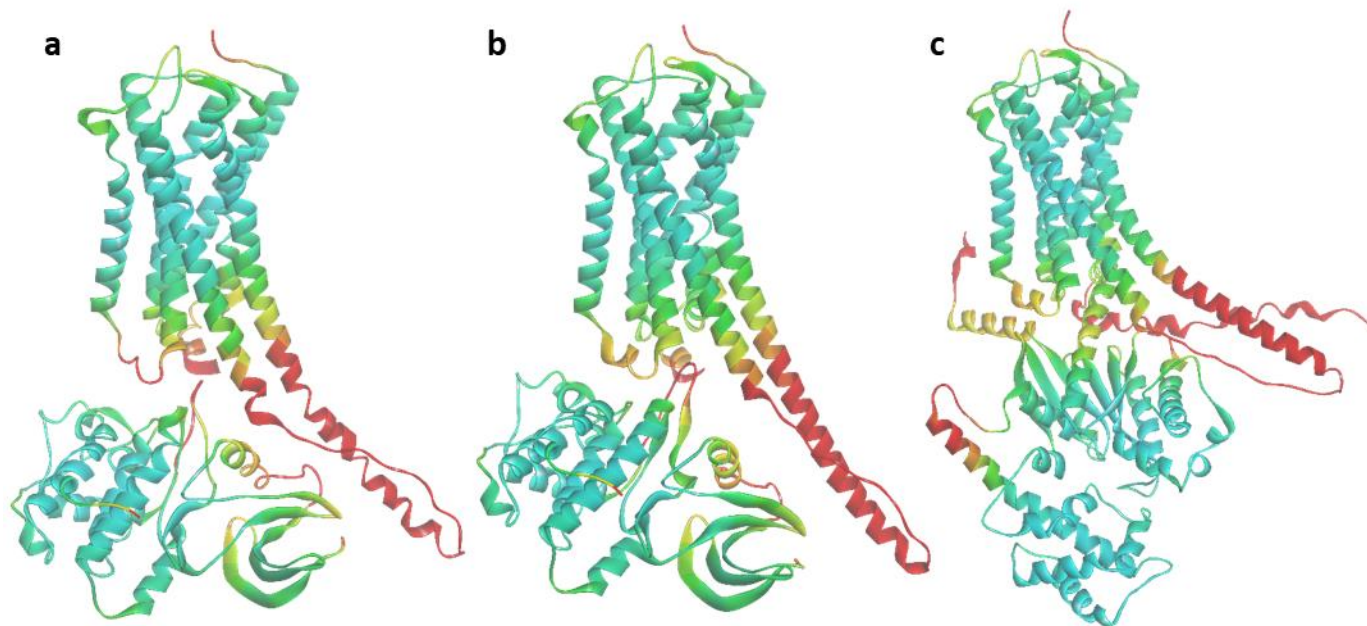

**Additional file 9. Selected initial ColabFold protein complex models.**

**a.** *h5HT7/CDK5*, **b.** *m5HT7/CDK5*, **c.** *5HT7/Gas*. Protein colored based on aminoacid pLDDT (confidence) score.
