# Supplementary material for: Structural determinants for activation of the Tau kinase CDK5 by the serotonin receptor 5-HT7R
Source: PubMed Central journal article supplement (PMC11031989; doi:10.1186/s12964-024-01612-y), 2024-04-19
Supplement: 12964_2024_1612_MOESM10_ESM.pdf [file 12964_2024_1612_MOESM10_ESM.pdf]

**Additional file 10. RMSD comparison of ColabFold model protein complex subunits with experimentally available structures.**

| Model              | Subunit protein (PBD ID) | RMSD  |            |            |
|--------------------|--------------------------|-------|------------|------------|
|                    |                          | Ca    | Main chain | Side chain |
| <i>h</i> 5HT7/CDK5 | CDK5 (7VDP)              | 1.980 | 1.991      | 2.877      |
|                    | 5HT7R (7XTC)             | 1.436 | 1.473      | 2.450      |
| <i>m</i> 5HT7/CDK5 | CDK5 (7VDP)              | 1.919 | 1.913      | 2.362      |
|                    | 5HT7R (7XTC)             | 1.444 | 1.454      | 2.423      |
| 5HT7/Gas           | Gas (7XTC)               | 3.319 | 3.218      | 4.593      |
|                    | 5HT7R (7XTC)             | 2.343 | 2.371      | 3.090      |
