# Supplementary material for: Structural determinants for activation of the Tau kinase CDK5 by the serotonin receptor 5-HT7R
Source: PubMed Central journal article supplement (PMC11031989; doi:10.1186/s12964-024-01612-y), 2024-04-19
Supplement: 12964_2024_1612_MOESM11_ESM.pdf [file 12964_2024_1612_MOESM11_ESM.pdf]

**Additional file 11. List of PDB70 template structures used by the ColabFold algorithm for modeling of individual protein complex chains.\***

| 5HT7R  |                                 |                                       |                        |
|--------|---------------------------------|---------------------------------------|------------------------|
| PDB ID | Protein Name                    | Orgaism                               | Ligand                 |
| 2R4R   | Beta-2 adrenergic receptor      | <i>Homo sapiens</i>                   | None                   |
| 4AMJ   | Beta-1 adrenergic receptor      | <i>Meleagris gallopavo</i>            | Carvedilol (agonist)   |
| 4IAQ   | 5-Hydroxytryptamine Receptor 1B | <i>Homo sapiens</i>                   | Dihydroergotamine      |
| 4IAR   | 5-Hydroxytryptamine Receptor 1B | <i>Homo sapiens</i>                   | Ergotamine             |
| 6H7L   | Beta-1 adrenergic receptor      | <i>Meleagris gallopavo</i>            | Dobutamine (agonist)   |
| 6IBL   | Beta-1 adrenergic receptor      | <i>Meleagris gallopavo</i>            | Formoterol (agonist)   |
| 6KR8   | Beta-2 adrenergic receptor      | <i>Homo sapiens</i>                   | None                   |
| 7BVQ   | Beta-1 adrenergic receptor      | <i>Homo sapiens</i>                   | Carazolol              |
| 7CKW   | D(1A) dopamine receptor         | <i>Homo sapiens</i>                   | Fenoldopam             |
| 7CKY   | D(1A) dopamine receptor         | <i>Homo sapiens</i>                   | PW0464                 |
| 7DH5   | Beta-3 adrenergic receptor      | <i>Canis lupus familiaris</i>         | Mirabegron             |
| 7E2X   | 5-Hydroxytryptamine Receptor 1A | <i>Homo sapiens</i>                   | None                   |
| 7E32   | 5-Hydroxytryptamine Receptor 1D | <i>Homo sapiens</i>                   | Serotonin              |
| 7E33   | 5-Hydroxytryptamine Receptor 1E | <i>Homo sapiens</i>                   | Serotonin              |
| 7EXD   | 5-Hydroxytryptamine Receptor 1F | <i>Homo sapiens</i>                   | Lasmiditan             |
| 7EZM   | Cholecystokinin A receptor      | <i>Homo sapiens</i>                   | None                   |
| 7JOZ   | D(1A) dopamine receptor         | <i>Homo sapiens</i>                   | Non-catechol agonist   |
| 7JVP   | D(1A) dopamine receptor         | <i>Homo sapiens</i>                   | SKF-83959              |
| CDK5   |                                 |                                       |                        |
| 1OB3   | PfPK5                           | <i>Plasmodium falciparum</i>          | None                   |
| 1UA2   | CDK7                            | <i>Homo sapiens</i>                   | ATP                    |
| 1UNL   | CDK5/p25                        | <i>Homo sapiens</i>                   | R-Roscovitine          |
| 1V0B   | PfPK5 (T198A mutant)            | <i>Plasmodium falciparum</i>          | None                   |
| 1V0O   | PfPK5                           | <i>Plasmodium falciparum</i>          | Indirubin-5-sulphonate |
| 3GBZ   | CMGC CDK                        | <i>Giardia lamblia ATCC 50803</i>     | None                   |
| 3GC0   | CMGC CDK                        | <i>Giardia lamblia ATCC 50803</i>     | AMP                    |
| 3NIZ   | CDK CGD5_2510                   | <i>Cryptosporidium parvum</i>         | ADP                    |
| 3QHR   | pCDK2/CyclinA                   | <i>Homo sapiens, Mus musculus</i>     | ADP                    |
| 4AU8   | CDK5                            | <i>Homo sapiens</i>                   | Compound 4a            |
| 4KRC   | CDK PHO85                       | <i>Saccharomyces cerevisiae S288C</i> | ATP-γ-S                |

|             |                    |                                   |              |
|-------------|--------------------|-----------------------------------|--------------|
| <b>4KRD</b> | CDK PHO85/Pcl10    | Saccharomyces cerevisiae<br>S288C | None         |
| <b>4YC3</b> | CDK1/CyclinB1/CKS2 | <i>Homo sapiens</i>               | None         |
| <b>5G6V</b> | CDK16              | <i>Homo sapiens</i>               | Inhibitor    |
| <b>6GU2</b> | CDK1/CyclinB/CKS2  | <i>Homo sapiens</i>               | Flavopiridol |
| <b>6O9L</b> | CDK7               | <i>Homo sapiens</i>               | None         |
| <b>6Q4G</b> | CDK2               | <i>Homo sapiens</i>               | FragLite37   |
| <b>6Q4K</b> | CDK2               | <i>Homo sapiens</i>               | FragLite38   |
| <b>6XBZ</b> | CDK7               | <i>Homo sapiens</i>               | AGS          |
| <b>7B5Q</b> | CDK7               | <i>Homo sapiens</i>               | ICEC0942     |

### Gas

| <b>PDB ID</b> | <b>Protein Name</b>                                                  | <b>Organism</b>          | <b>Ligand</b> |
|---------------|----------------------------------------------------------------------|--------------------------|---------------|
| <b>1CIP</b>   | Guanine nucleotide-binding protein G(i) subunit alpha-1              | <i>Rattus norvegicus</i> | GNP           |
| <b>1SHZ</b>   | Guanine nucleotide-binding protein G(i) subunit alpha-1              | <i>Rattus norvegicus</i> | GDP           |
| <b>1TAD</b>   | Guanine nucleotide-binding protein G(t) subunit alpha-1              | <i>Bos taurus</i>        | GDP           |
| <b>1TAG</b>   | Guanine nucleotide-binding protein G(t) subunit alpha-1              | <i>Bos taurus</i>        | GDP           |
| <b>1TND</b>   | Guanine nucleotide-binding protein G(t) subunit alpha-1              | <i>Bos taurus</i>        | GSP           |
| <b>1ZCA</b>   | Guanine nucleotide-binding protein subunit alpha-12                  | <i>Mus musculus</i>      | GDP           |
| <b>1ZCB</b>   | Guanine nucleotide-binding protein subunit alpha-13                  | <i>Mus musculus</i>      | GDP           |
| <b>3CX8</b>   | Guanine nucleotide-binding protein subunit alpha-13                  | <i>Mus musculus</i>      | GDP           |
| <b>4EKC</b>   | Guanine nucleotide-binding protein G(q) subunit alpha                | <i>Mus musculus</i>      | GDP           |
| <b>4EKD</b>   | Guanine nucleotide-binding protein G(q) subunit alpha                | <i>Mus musculus</i>      | GDP           |
| <b>4N0D</b>   | Guanine nucleotide-binding protein G(i) subunit alpha-1              | <i>Rattus norvegicus</i> | GNP           |
| <b>5DO9</b>   | Guanine nucleotide-binding protein G(q) subunit alpha                | <i>Mus musculus</i>      | GDP           |
| <b>6AU6</b>   | Guanine nucleotide-binding protein G(s) subunit alpha isoforms short | <i>Homo sapiens</i>      | GDP           |
| <b>6CMO</b>   | Guanine nucleotide-binding protein G(i) subunit alpha-1              | <i>Homo sapiens</i>      | None          |
| <b>6NE6</b>   | G-protein alpha subunit Galpha7                                      | <i>Naegleria fowleri</i> | None          |

|             |                                                                      |                     |      |
|-------------|----------------------------------------------------------------------|---------------------|------|
| <b>7BPH</b> | Guanine nucleotide-binding protein G(s) subunit alpha isoforms short | <i>Homo sapiens</i> | GNP  |
| <b>7FIG</b> | Engineered guanine nucleotide-binding protein G(s) subunit alpha     | <i>Bos taurus</i>   | None |
| <b>7RKF</b> | Guanine nucleotide-binding protein subunit alpha-11                  | <i>Homo sapiens</i> | GDP  |
| <b>7SQ2</b> | Guanine nucleotide-binding protein G(q) subunit alpha                | <i>Mus musculus</i> | GDP  |

\*The templates chosen to model the 5-HT7R in *h5HT7/CDK5*, *m5HT7/CDK5* and *5HT7/Gas* were the same in all 3 individual cases. Same for *hCDK5* and *mCDK5* – the templates chosen by ColabFold algorithm were the same.
