# Supplementary material for: Structural determinants for activation of the Tau kinase CDK5 by the serotonin receptor 5-HT7R
Source: PubMed Central journal article supplement (PMC11031989; doi:10.1186/s12964-024-01612-y), 2024-04-19

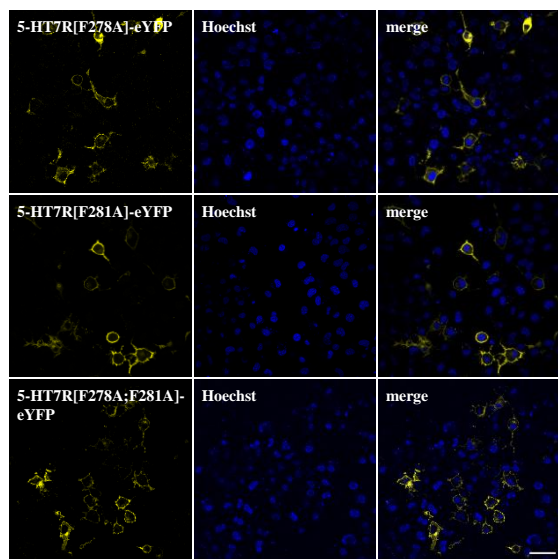

**Additional file 12. Expression of 5-HT7R mutants.**

Representative confocal images of N1E-115 cells expressing eYFP-tagged 5-HT7R WT or mutants F278A, F281A or F278A;F281A. Nuclei were visualized using Hoechst33342. Scale bar: 50  $\mu$ m.

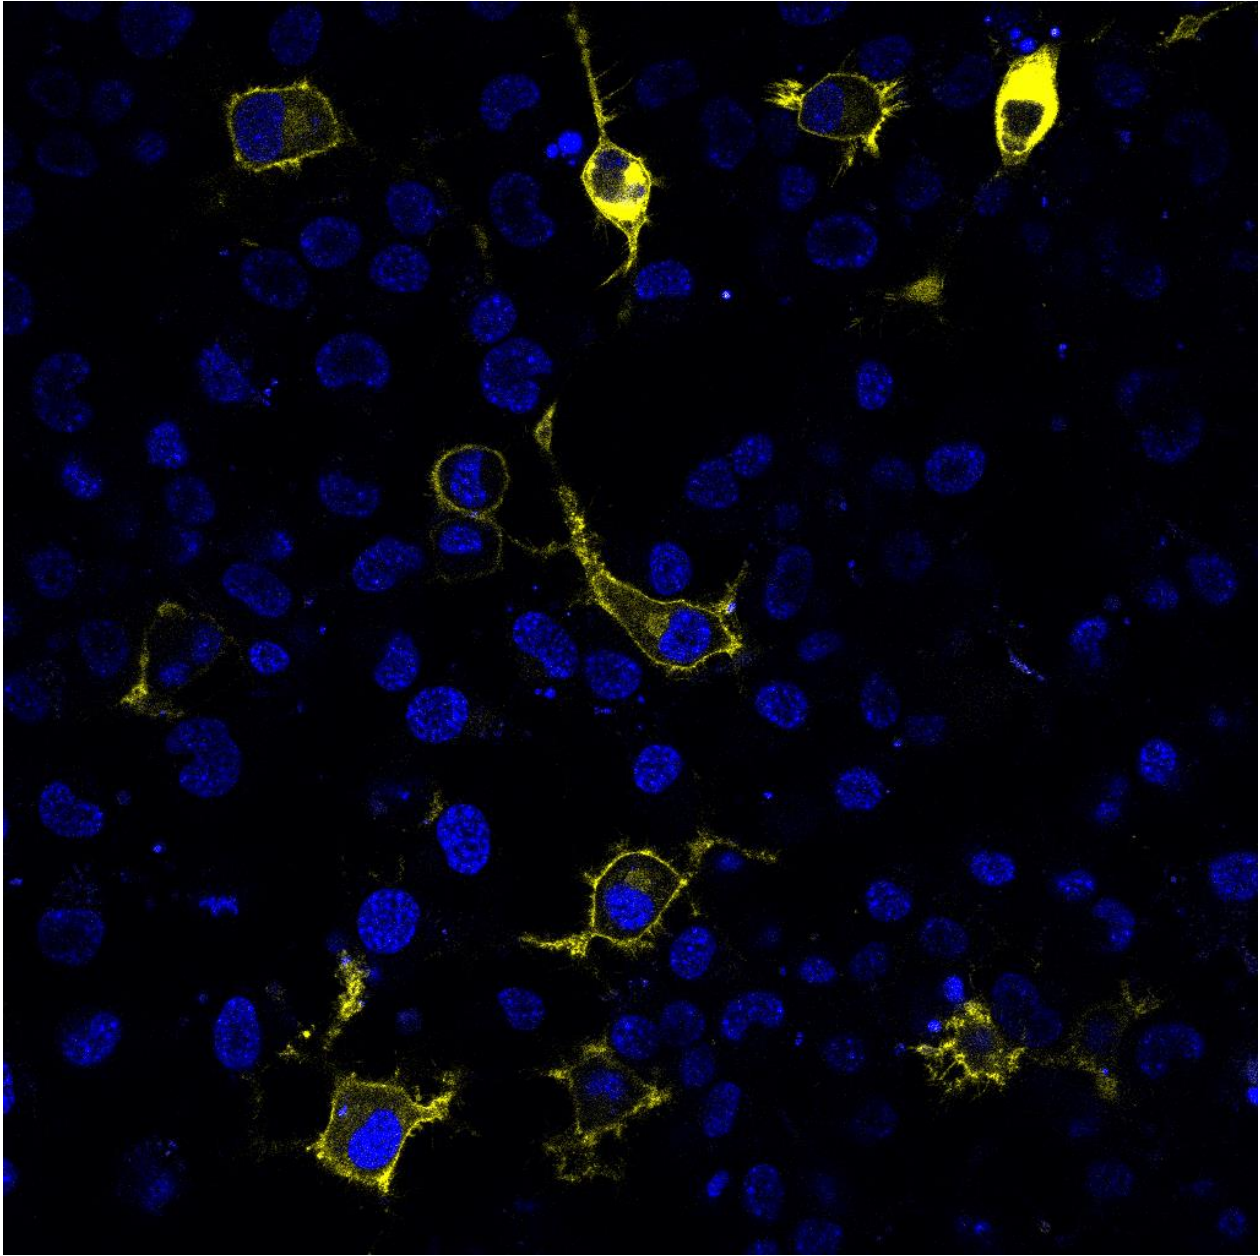

Supplement: 12964_2024_1612_MOESM12_ESM.pdf [file 12964_2024_1612_MOESM12_ESM.pdf]
