# Supplementary material for: Structural determinants for activation of the Tau kinase CDK5 by the serotonin receptor 5-HT7R
Source: PubMed Central journal article supplement (PMC11031989; doi:10.1186/s12964-024-01612-y), 2024-04-19
Supplement: 12964_2024_1612_MOESM13_ESM.pdf [file 12964_2024_1612_MOESM13_ESM.pdf]

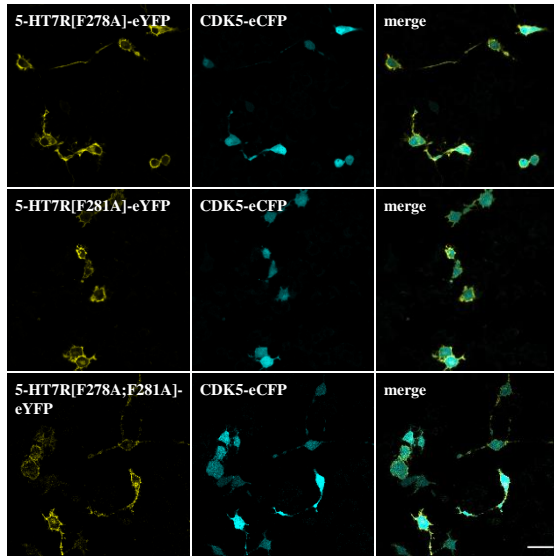

**Additional file 13. Co-expression of CDK5 and 5-HT7R mutants.**

Representative confocal images of N1E-115 cells co-expressing CDK5-eCFP and eYFP-tagged 5-HT7R mutants F278A, F281A or F278A;F281A. Scale bar: 50  $\mu$ m.
