# Supplementary material for: Structural determinants for activation of the Tau kinase CDK5 by the serotonin receptor 5-HT7R
Source: PubMed Central journal article supplement (PMC11031989; doi:10.1186/s12964-024-01612-y), 2024-04-19
Supplement: 12964_2024_1612_MOESM14_ESM.pdf [file 12964_2024_1612_MOESM14_ESM.pdf]

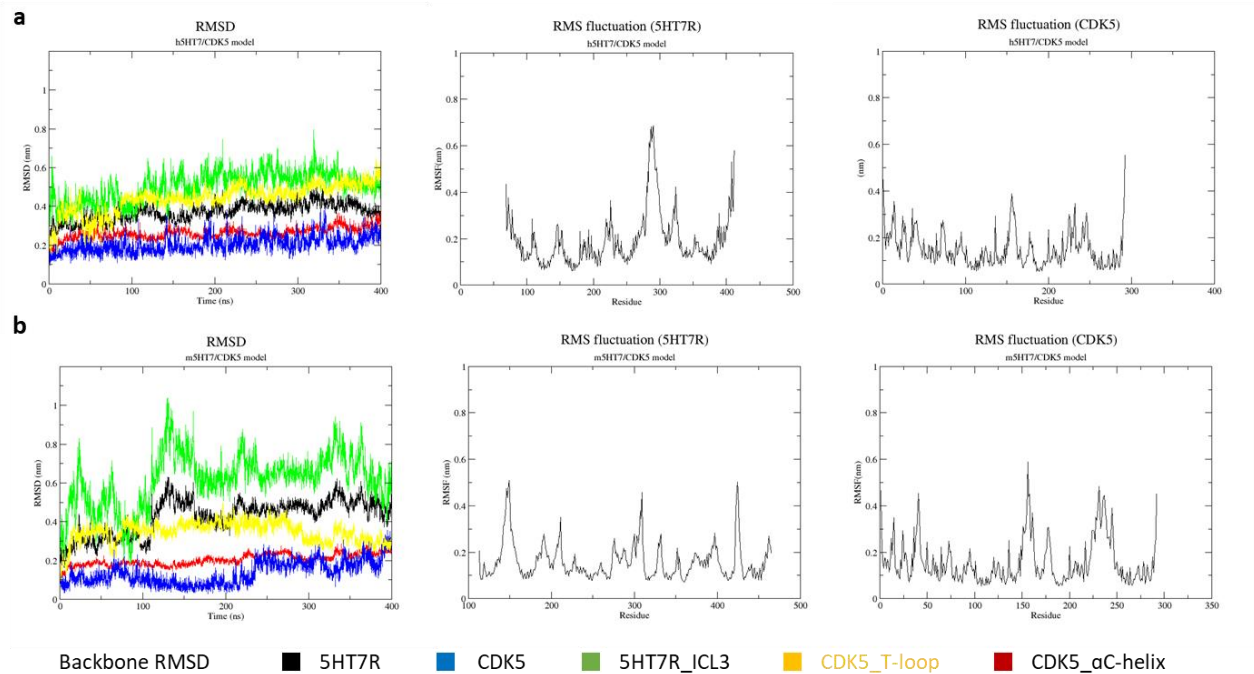

**Additional file 14. Molecular dynamics group atom displacement analysis.**

RMSD and RMSF graphs for models. **a.** *h5HT7/CDK5*, **b.** *m5HT7/CDK5*.
