# Supplementary material for: Structural determinants for activation of the Tau kinase CDK5 by the serotonin receptor 5-HT7R
Source: PubMed Central journal article supplement (PMC11031989; doi:10.1186/s12964-024-01612-y), 2024-04-19
Supplement: 12964_2024_1612_MOESM15_ESM.pdf [file 12964_2024_1612_MOESM15_ESM.pdf]

**Additional file 15. Comparison of protein-protein interface area and interactions at the starting point and during the final 10 ns of MD Simulation.**

| <b>Model system</b> | <b>MD time, ns</b> | <b>Total Pi Interactions</b> | <b>Total Hydrogen Bonds</b> | <b>Total Salt Bridges</b> | <b>CDK5 Contact Surface Area</b> | <b>CDK5 Polar Contact Surface Area</b> | <b>CDK5 Nonpolar Contact Surface Area</b> | <b>5-HT7R Contact Surface Area</b> | <b>5HT7R Polar Contact Surface Area</b> | <b>5HT7R Nonpolar Contact Surface Area</b> |
|---------------------|--------------------|------------------------------|-----------------------------|---------------------------|----------------------------------|----------------------------------------|-------------------------------------------|------------------------------------|-----------------------------------------|--------------------------------------------|
| <i>m</i> 5HT7/CDK5  | 0                  | 3                            | 15                          | 2                         | 436.55                           | 228.03                                 | 208.52                                    | 424.98                             | 154.92                                  | 270.06                                     |
|                     | 390-400            | 3.18±1.17                    | 14.9±1.44                   | 2.27±0.64                 | 502±59                           | 227±21                                 | 275±21                                    | 483±59                             | 191±28                                  | 291±33                                     |
| <i>h</i> 5HT7/CDK5  | 0                  | 3                            | 9                           | 1                         | 343.53                           | 157.72                                 | 185.8                                     | 363.26                             | 163.56                                  | 199.71                                     |
|                     | 390-400            | 2.80±0.63                    | 14.10±2.18                  | 2.70±0.67                 | 483±46                           | 235±27                                 | 249±25                                    | 489±47                             | 193±30                                  | 297±29                                     |
